# Supplementary material for: Cell autonomous microglia defects in a stem cell model of frontotemporal dementia
Source: bioRxiv or medRxiv preprint supplement (doi:10.1101/2024.05.15.24307444), 2024-05-16

# Supplemental Figure 1

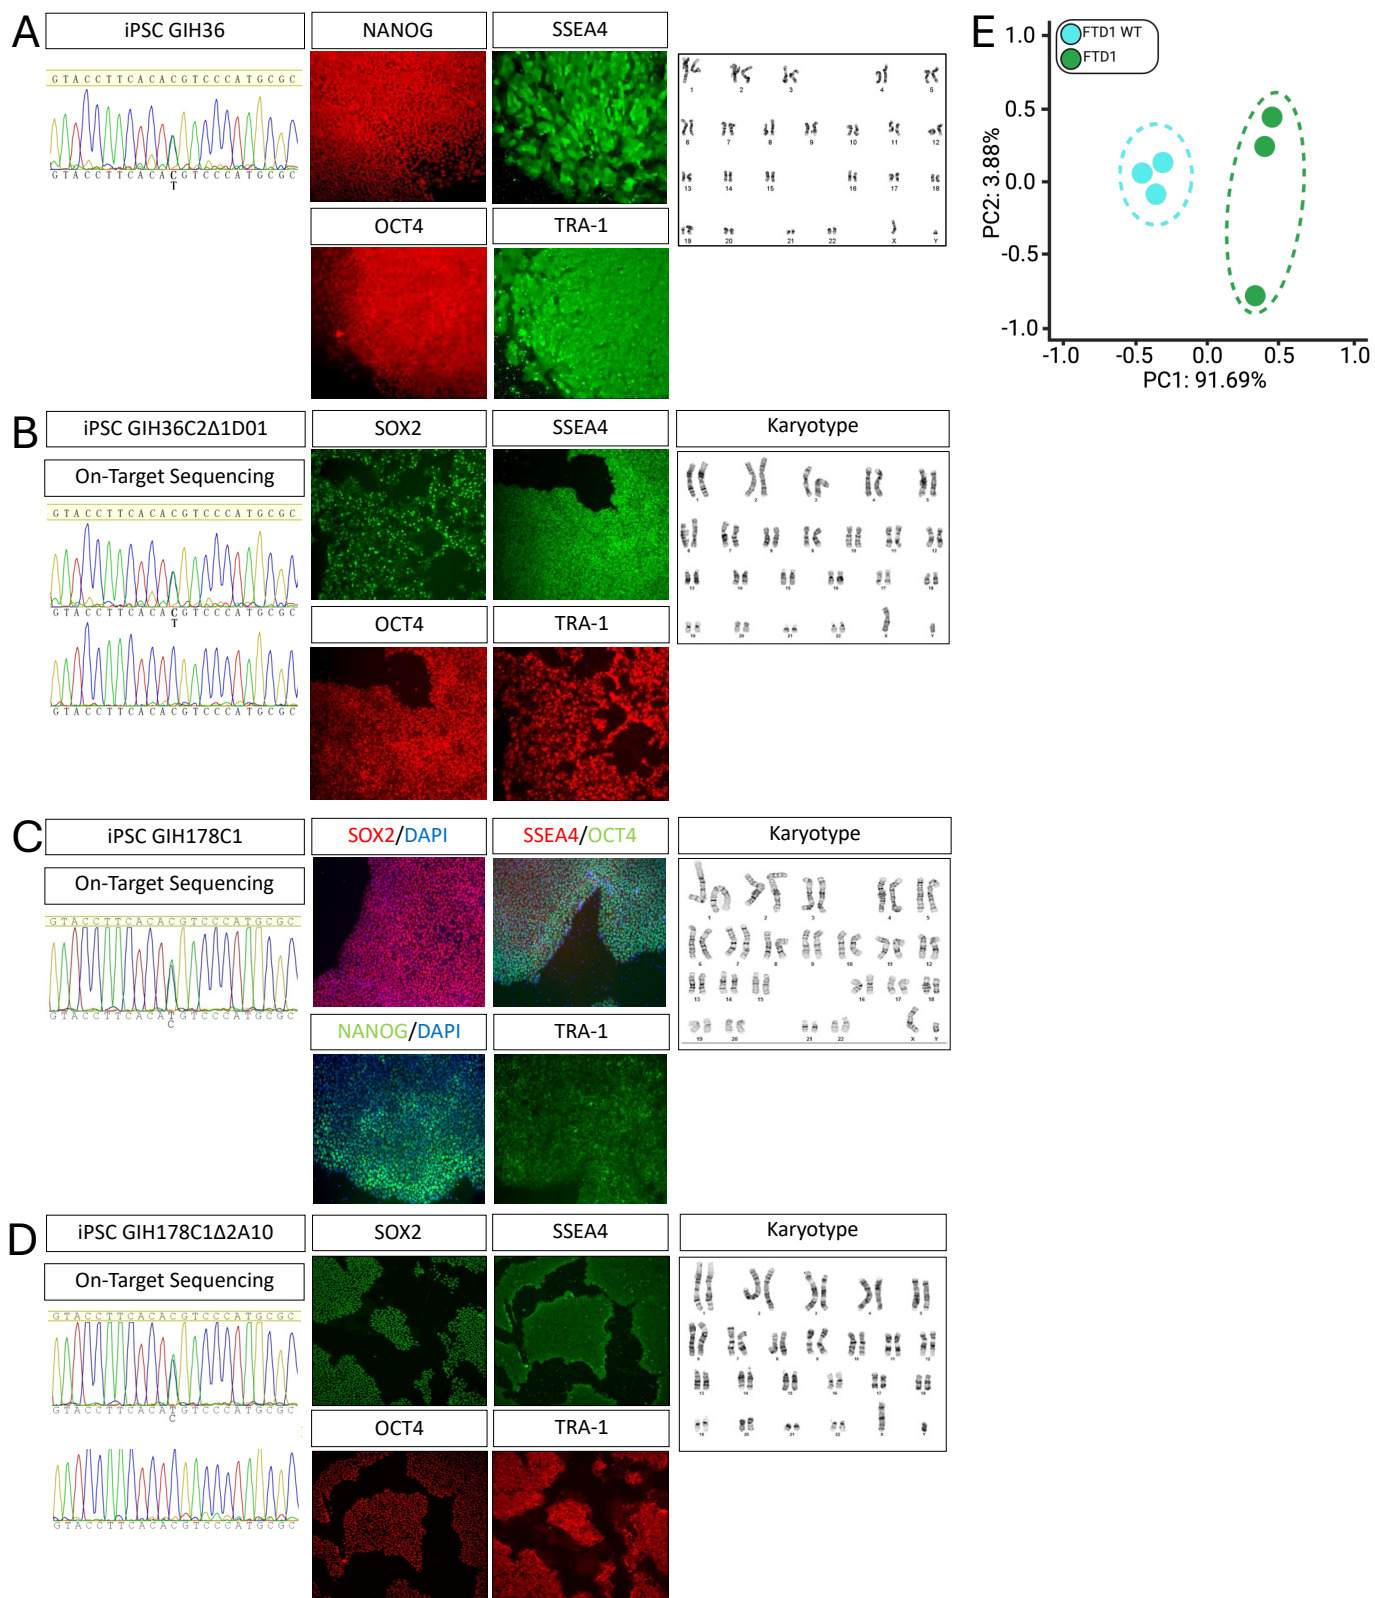

# Supplemental Figure 2

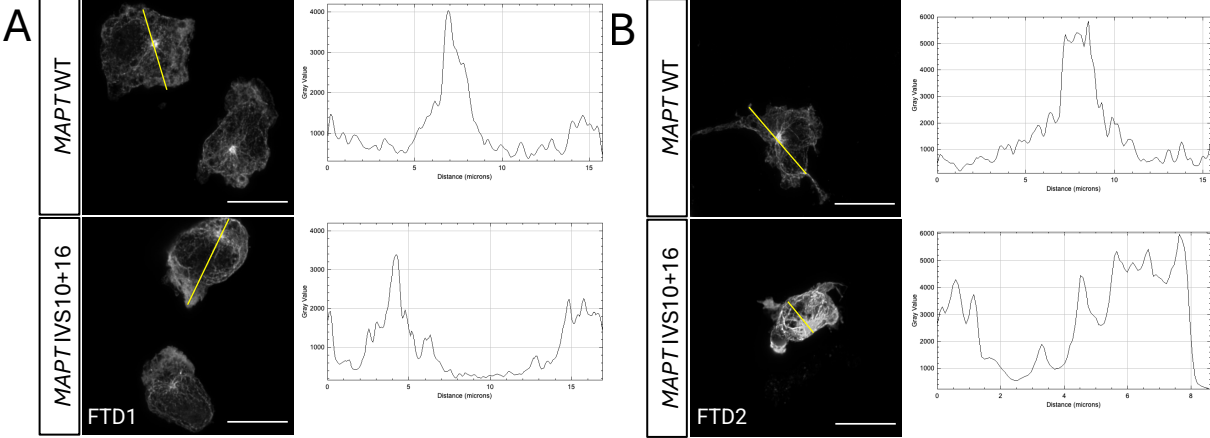

# Supplemental Figure 3

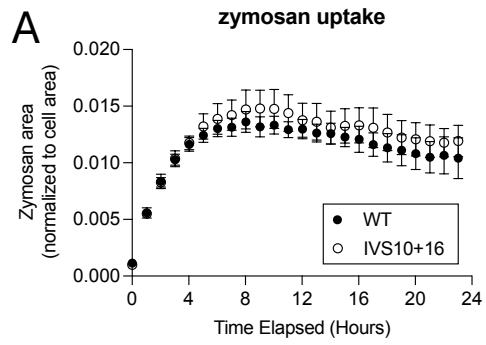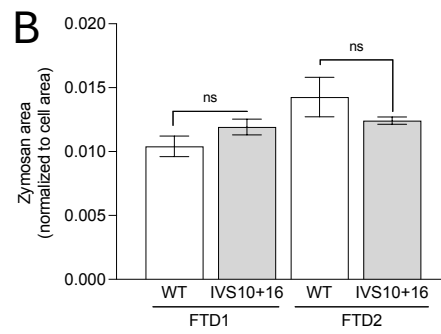

# Supplemental Figure 4

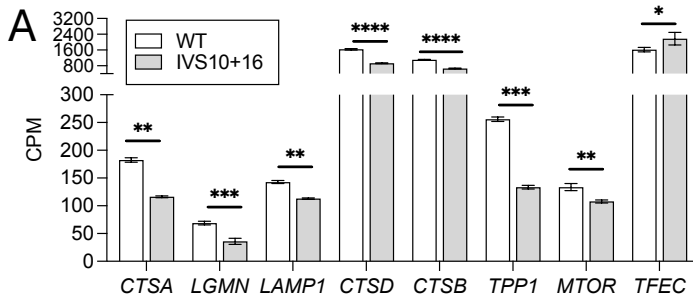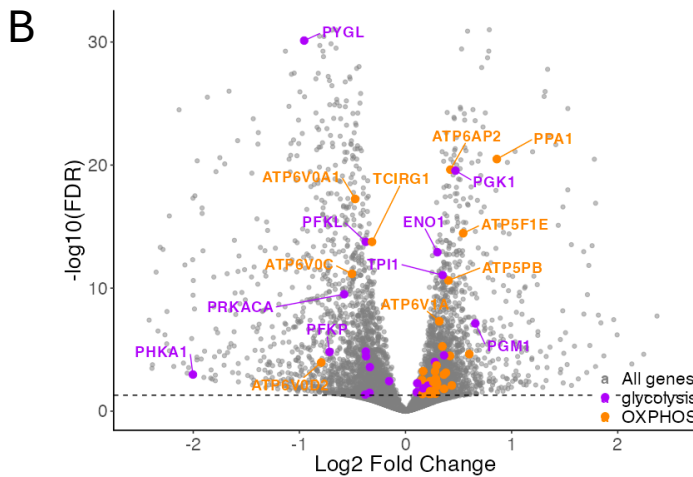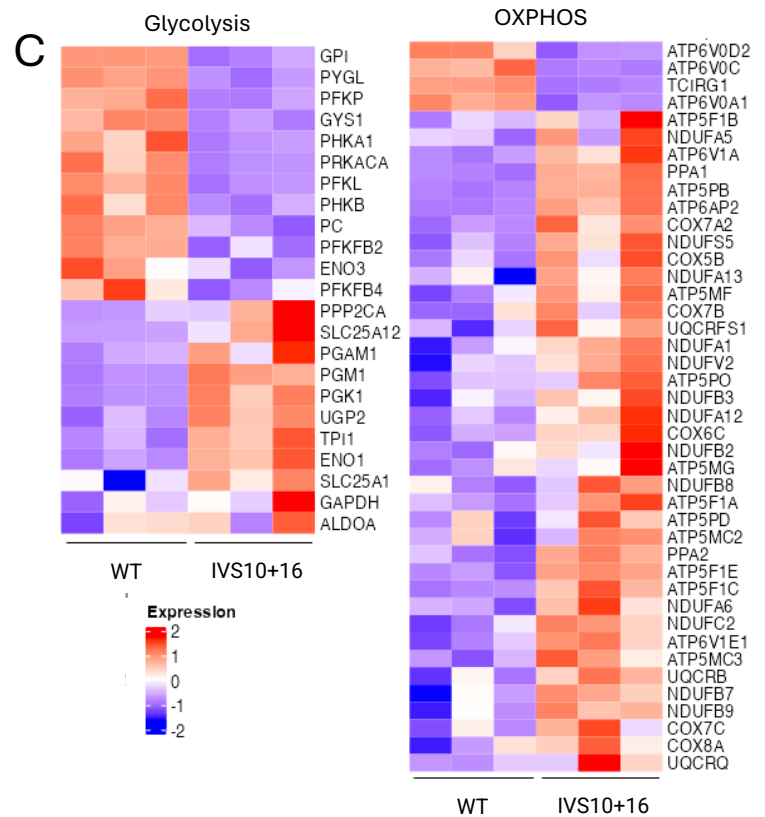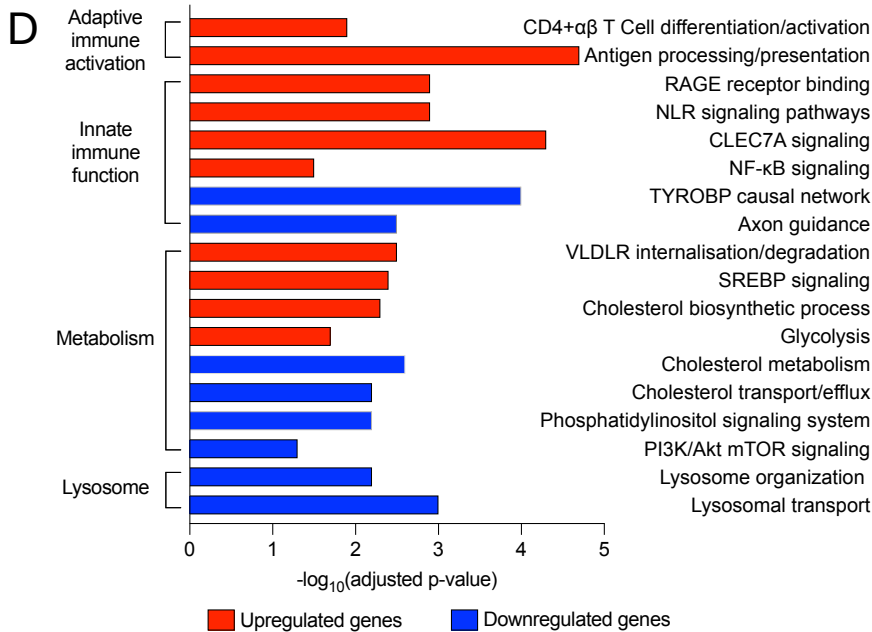

Supplement: Supplementary file [file media-1.pdf]
